# Supplementary material
Source: PubMed Central journal article supplement (PMC3854109)
Supplement: supp_blood-2013-08-519009_blood-2013-08-519009-1.pdf [file supp_blood-2013-08-519009_blood-2013-08-519009-1.pdf]

Appendix Table 1: Multivariate model of grade III-IV acute GVHD stratified by **disease type** (AML early vs. AML intermediate vs. AML advanced vs. CML early vs. CML intermediate vs. CML advanced vs. MDS early vs. MDS advanced), **donor type** (HLA-id sib vs. well-matched unrelated vs. partially matched unrelated), and **performance score** (< 90 vs. ≥ 90).

| Factor                                    | Level           | n    | HR (95% CI)           | p-value |
|-------------------------------------------|-----------------|------|-----------------------|---------|
| <b>Conditioning regimen (main effect)</b> | TBI             | 445  | 1                     |         |
|                                           | Bu              | 991  | 0.812 (0.627 – 1.052) | 0.1144  |
| <b>ATG/Campath</b>                        | No              | 1107 | 1                     |         |
|                                           | Yes             | 329  | 0.682 (0.491 – 0.948) | 0.0226  |
| <b>Sex match</b>                          | Male – Male     | 447  | 1                     | 0.0182* |
|                                           | Male - Female   | 430  | 0.677 (0.490 – 0.938) | 0.0188  |
|                                           | Female – Male   | 271  | 1.185 (0.849 – 1.655) | 0.3187  |
|                                           | Female - Female | 288  | 0.976 (0.699 – 1.364) | 0.8879  |

\* overall p-value

Abbreviations: ATG, antithymocyte globulin; Bu, busulfan; TBI, total body irradiation.

Appendix Table 2: Multivariate Model of Chronic GVHD stratified by **disease type** (AML early vs. AML intermediate vs. AML advanced vs. CML early vs. CML intermediate vs. CML advanced vs. MDS early vs. MDS advanced), **donor type** (HLA-id sib vs. well-matched unrelated vs. partially matched unrelated), and **performance score** (< 90 vs. ≥ 90).

| Factor                                    | Level                       | n    | HR (95% CI)           | p-value |
|-------------------------------------------|-----------------------------|------|-----------------------|---------|
| <b>Conditioning regimen (main effect)</b> | TBI                         | 445  | 1                     |         |
|                                           | BU                          | 991  | 1.073 (0.896 – 1.286) | 0.4411  |
| <b>Patient age</b>                        | ≤ 19                        | 198  | 1                     | 0.0001* |
|                                           | 20 – 49                     | 702  | 1.722 (1.216 – 2.438) | 0.0022  |
|                                           | ≥ 50                        | 534  | 2.099 (1.470 – 2.997) | <.0001  |
| <b>Graft type</b>                         | BM                          | 334  | 1                     |         |
|                                           | PB                          | 1102 | 1.760 (1.368 – 2.264) | <.0001  |
| <b>GVHD prophylaxis</b>                   | CNI + MTX                   | 904  | 1                     | 0.0334* |
|                                           | CNI + MTX + other           | 240  | 1.328 (1.062 – 1.660) | 0.0129  |
|                                           | CNI + MMF +/- other         | 191  | 1.284 (1.014 – 1.626) | 0.0378  |
|                                           | CNI +/- other (no MTX, MMF) | 101  | 1.133 (0.801 – 1.603) | 0.4794  |
| <b>ATG/Campath</b>                        | No                          | 1107 | 1                     |         |
|                                           | Yes                         | 329  | 0.639 (0.508 – 0.802) | 0.0001  |
| <b>Sexmatch</b>                           | Male – Male                 | 447  | 1                     | 0.0313* |
|                                           | Male - Female               | 430  | 1.017 (0.825 – 1.254) | 0.8751  |
|                                           | Female – Male               | 271  | 1.359 (1.086 – 1.702) | 0.0074  |
|                                           | Female - Female             | 288  | 1.164 (0.927 – 1.462) | 0.1914  |

\* overall p-value

Abbreviations: ALL, acute lymphoblastic leukemia; AML, acute myeloid leukemia; adv, advanced disease; ATG, antithymocyte globulin; BM, bone marrow; BU, busulfan; CML, chronic myelogenous leukemia; CNI, calcineurin inhibitor; CSA, cyclosporine A; int, intermediate; MDS, myelodysplasia; MMF, mycophenolate mofetil; MTX, methotrexate; PB, peripheral blood; TBI, total body irradiation.

Appendix Table 3: Comparison of recipients of Fludarabine and Busulfan (FLUBU) to Cyclophosphamide and Busulfan (BUCY) as part of myeloablative conditioning prior to hematopoietic cell transplantation for myeloid malignancies.

| Characteristics of patients             | FLUBU    | BUCY     |
|-----------------------------------------|----------|----------|
| Number of patients                      | 424      | 601      |
| Number of centers                       | 36       | 68       |
| Male                                    | 211 (50) | 299 (50) |
| Karnofsky score 90-100%                 | 253 (61) | 345 (70) |
| HCI-CI                                  |          |          |
| 0                                       | 128 (30) | 272 (45) |
| 1-2                                     | 140 (33) | 162 (27) |
| ≥ 3                                     | 156 (37) | 167 (28) |
| Disease                                 |          |          |
| AML                                     | 296 (70) | 404 (67) |
| CML                                     | 39 ( 9)  | 69 (11)  |
| MDS                                     | 89 (21)  | 128 (21) |
| Disease status                          |          |          |
| AML early                               | 179 (42) | 236 (39) |
| AML intermediate                        | 62 (15)  | 81 (13)  |
| AML advanced                            | 56 (13)  | 87 (14)  |
| CML early                               | 23 ( 5)  | 36 ( 6)  |
| CML intermediate                        | 7 ( 2)   | 14 ( 2)  |
| CML advanced                            | 9 ( 2)   | 19 ( 3)  |
| MDS early                               | 25 ( 6)  | 37 ( 6)  |
| MDS advanced                            | 61 (14)  | 90 (15)  |
| MDS NOS                                 | 2 (<1)   | 1 (<1)   |
| Prior Auto transplant                   | 15 ( 4)  | 6 (<1)   |
| Graft type                              |          |          |
| Peripheral blood                        | 381 (90) | 406 (68) |
| Donor type                              |          |          |
| HLA-identical sib                       | 142 (33) | 275 (46) |
| Well-matched unrelated                  | 223 (53) | 256 (43) |
| Partially matched unrelated             | 54 (13)  | 61 (10)  |
| Mismatched                              | 1 (<1)   | 1 (<1)   |
| HLA match information missing unrelated | 4 (<1)   | 8 ( 1)   |
| GVHD prophylaxis                        |          |          |
| CSA/FK + MTX                            | 235 (55) | 439 (73) |
| CSA/FK + MTX + ATG/Campath              | 36 ( 8)  | 42 ( 7)  |
| CSA/FK (No MTX)                         | 18 ( 4)  | 47 ( 8)  |
| CSA/FK (No MTX) + ATG/Campath           | 1 (<1)   | 5 (<1)   |
| CSA/FK + MMF                            | 112 (26) | 40 ( 7)  |
| CSA/FK + MMF + ATG/Campath              | 10 ( 2)  | 2 (<1)   |

| Characteristics of patients                                               | FLUBU        | BUCY          |
|---------------------------------------------------------------------------|--------------|---------------|
| CSA/FK + MTX + MMF                                                        | 10 ( 2)      | 22 ( 4)       |
| CSA/FK + MTX + MMF + ATG/Campath                                          | 2 (<1)       | 4 (<1)        |
| ATG/Campath                                                               | 156 (37)     | 130 (22)      |
|                                                                           |              |               |
| Number of inpatient days in first 100 days post HCT, median (range), days | 25 (4 - 106) | 27 (<1 - 100) |
| Busulfan schedule                                                         |              |               |
| Every 6 hours                                                             | 91 (21)      | 495 (82)      |
| Daily                                                                     | 331 (78)     | 96 (16)       |
| Other schedule                                                            | 2 (<1)       | 10 (<1)       |
| Busulfan dose adjusted based on PK with a plan                            |              |               |
| No                                                                        | 55 (24)      | 67 (20)       |
| Yes                                                                       | 175 (76)     | 268 (80)      |
| Median follow-up of survivors, range, months                              | 23 (3 - 36)  | 16 (5 - 36)   |

Abbreviations: ALL, acute lymphoblastic leukemia; AML, acute myeloid leukemia; ATG, antithymocyte globulin; CML, chronic myelogenous leukemia; CMV, cytomegalovirus; CNI, calcineurin inhibitor; CSA, cyclosporine A; Cy, cyclophosphamide; Flu, fludarabine; HCT CI, hematopoietic cell transplant comorbidity index; MDS, myelodysplasia; MMF, mycophenolate mofetil; MTX, methotrexate; PK, pharmacokinetics; Tacro, tacrolimus; TBI, total body irradiation.
